# Supplementary material
Source: PubMed Central journal article supplement (PMC8333245)
Supplement: NIHMS1670086-supplement-1.pdf [file NIHMS1670086-supplement-1.pdf]

Supplemental Figure legend: Age-standardized hepatocellular carcinoma incidence rates, 2000-2017 by SEER cancer registry.

Journal Pre-proof

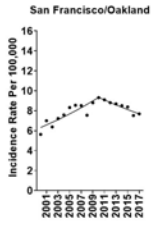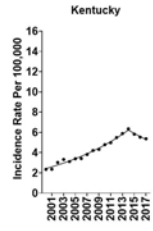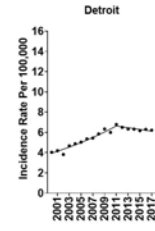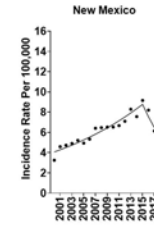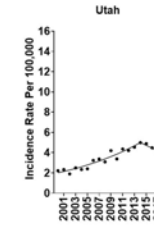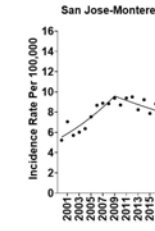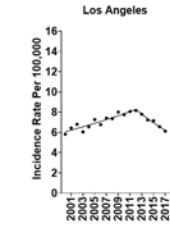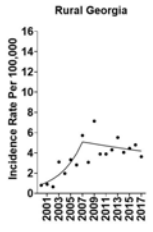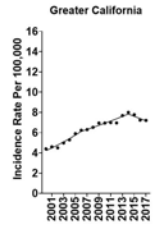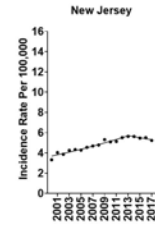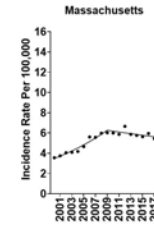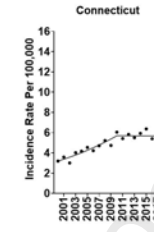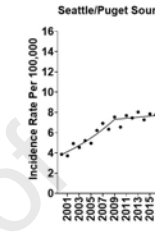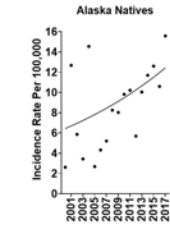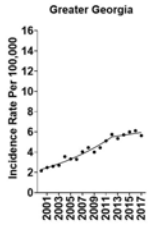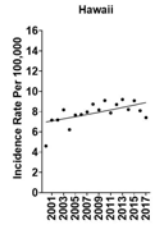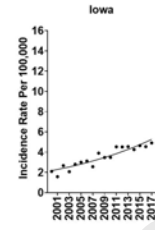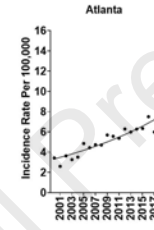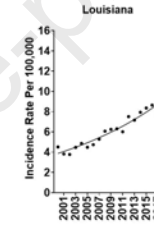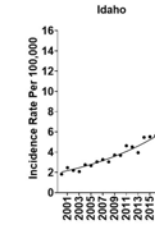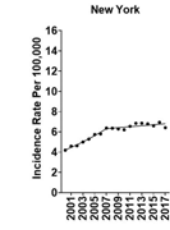

Journal Pre-proof
